# Supplementary material for: Controllable preparation, network structures and properties of unusual metal–organic frameworks constructed from 4,4′-(hexafluoroisopropylidene)diphthalic acid and 4,4′-bipyridyl
Source: Royal Society of Chemistry journal article supplement (doi:10.1039/b712024a), 2008-01-01
Supplement: b712024a.pdf [file b712024a.pdf]

*Electronic Supplementary Information*

**Controllable preparation, network structures and properties of unusual metal-organic frameworks constructed from 4,4'-(hexafluoroisopropylidene)diphthalic acid and 4,4'-bipyridyl**

*Rui-Qin Zhong,<sup>a,b</sup> Ru-Qiang Zou,<sup>a,b</sup> Miao Du,<sup>a</sup> Tetsuya Yamada,<sup>c</sup> Goro Maruta,<sup>c</sup> Sadamu Takeda<sup>c</sup> and Qiang Xu<sup>\*,a,b</sup>*

<sup>a</sup> *National Institute of Advanced Industrial Science and Technology (AIST), Ikeda, Osaka 563-8577, Japan*

<sup>b</sup> *Graduate School of Engineering, Kobe University, Nada Ku, Kobe, Hyogo 657-8501, Japan*

<sup>c</sup> *Department of Chemistry, Faculty of Science and Graduate School of Science, Hokkaido University, Sapporo 060-0810, Japan*

**Table S1** Selected bond lengths and angles for **1**

|                    |            |                     |            |
|--------------------|------------|---------------------|------------|
| Ni(1)-O(1W)        | 2.048(3)   | Ni(1)-O(4)#1        | 2.055(2)   |
| Ni(1)-O(3)         | 2.065(2)   | Ni(1)-O(2)          | 2.068(2)   |
| Ni(1)-N(2)#2       | 2.103(3)   | Ni(1)-N(1)          | 2.117(3)   |
| O(1W)-Ni(1)-O(4)#1 | 94.65(10)  | O(1W)-Ni(1)-O(3)    | 175.77(10) |
| O(4)#1-Ni(1)-O(3)  | 81.14(9)   | O(1W)-Ni(1)-O(2)    | 91.33(10)  |
| O(4)#1-Ni(1)-O(2)  | 170.66(10) | O(3)-Ni(1)-O(2)     | 92.79(9)   |
| O(1W)-Ni(1)-N(2)#2 | 89.45(12)  | O(4)#1-Ni(1)-N(2)#2 | 95.43(10)  |
| O(3)-Ni(1)-N(2)#2  | 91.39(12)  | O(2)-Ni(1)-N(2)#2   | 91.79(11)  |
| O(1W)-Ni(1)-N(1)   | 90.52(12)  | O(4)#1-Ni(1)-N(1)   | 85.87(10)  |
| O(3)-Ni(1)-N(1)    | 88.73(12)  | O(2)-Ni(1)-N(1)     | 86.91(11)  |
| N(2)#2-Ni(1)-N(1)  | 178.70(11) |                     |            |

Symmetry transformations used to generate equivalent atoms: #1:  $-x+0.5, y-0.5, -z+1$ ; #2:  $x, y, z-1$ ;

#3:  $-x, -y+1, z$ ; #4:  $x, y, z+1$ ; #5:  $-x+0.5, y+0.5, -z+1$ ; #6:  $-x, -y+2, z$ .

**Table S2** Selected bond lengths (Å) and angles (°) for **2**

|                   |            |                     |           |
|-------------------|------------|---------------------|-----------|
| Ni(1)-O(3)        | 2.062(1)   | Ni(1)-N(2)          | 2.089(2)  |
| Ni(1)-O(4)#1      | 2.095(1)   | Ni(1)-O(1)          | 2.102(2)  |
| Ni(1)-N(1)        | 2.127(2)   | Ni(1)-N(3)          | 2.136(2)  |
| Ni(2)-N(4)#2      | 2.044(2)   | Ni(2)-O(6)          | 2.056(1)  |
| Ni(2)-O(5)        | 2.148(2)   |                     |           |
| O(3)-Ni(1)-N(2)   | 178.36(8)  | O(3)-Ni(1)-O(4)#1   | 89.14(7)  |
| N(2)-Ni(1)-O(4)#1 | 89.37(8)   | O(3)-Ni(1)-O(1)     | 85.87(8)  |
| N(2)-Ni(1)-O(1)   | 95.47(8)   | O(4)#1-Ni(1)-O(1)   | 168.12(8) |
| O(3)-Ni(1)-N(1)   | 95.08(8)   | N(2)-Ni(1)-N(1)     | 85.85(9)  |
| O(4)#1-Ni(1)-N(1) | 99.88(8)   | O(1)-Ni(1)-N(1)     | 91.31(8)  |
| O(3)-Ni(1)-N(3)   | 89.07(8)   | N(2)-Ni(1)-N(3)     | 90.08(9)  |
| O(4)#1-Ni(1)-N(3) | 83.52(8)   | O(1)-Ni(1)-N(3)     | 85.62(8)  |
| N(1)-Ni(1)-N(3)   | 174.65(9)  | N(4)#2-Ni(2)-N(4)#3 | 90.68(14) |
| N(4)#2-Ni(2)-O(6) | 99.44(9)   | N(4)#3-Ni(2)-O(6)   | 96.73(9)  |
| O(6)#4-Ni(2)-O(6) | 156.92(11) | N(4)#2-Ni(2)-O(5)   | 93.21(9)  |
| N(4)#3-Ni(2)-O(5) | 162.48(9)  | O(6)#4-Ni(2)-O(5)   | 99.47(8)  |
| O(6)-Ni(2)-O(5)   | 63.14(7)   | O(5)-Ni(2)-O(5)#4   | 88.20(12) |

Symmetry transformations used to generate equivalent atoms: #1:  $-x+0.5, -y+0.5, -z+1$ ; #2:  $-x+0.5, y+1.5, -z+0.5$ ; #3:  $x-0.5, y+1.5, z$ ; #4:  $-x, y, -z+0.5$ .

**Table S3** Selected bond lengths(Å) and angles (°) for **3**

|                     |           |                     |           |
|---------------------|-----------|---------------------|-----------|
| Mn(1)-O(2)#1        | 2.085(2)  | Mn(1)-O(4)#2        | 2.098(2)  |
| Mn(1)-O(1)          | 2.121(2)  | Mn(1)-O(3)#3        | 2.180(2)  |
| Mn(1)-O(1W)         | 2.199(2)  |                     |           |
| O(2)#1-Mn(1)-O(4)#2 | 111.54(5) | O(2)#1-Mn(1)-O(1)   | 91.49(6)  |
| O(4)#2-Mn(1)-O(1)   | 89.83(5)  | O(2)#1-Mn(1)-O(3)#3 | 119.39(5) |
| O(4)#2-Mn(1)-O(3)#3 | 126.14(5) | O(1)-Mn(1)-O(3)#3   | 104.68(5) |
| O(2)#1-Mn(1)-O(1W)  | 82.03(6)  | O(4)#2-Mn(1)-O(1W)  | 86.17(6)  |
| O(1)-Mn(1)-O(1W)    | 170.53(5) | O(3)#3-Mn(1)-O(1W)  | 84.57(6)  |

Symmetry transformations used to generate equivalent atoms: #1:  $-x+0.5, y-0.5, -z+1.5$ ; #2:  $-x+0.5, y+0.5, -z+1.5$ ; #3:  $x, -y+2, z-0.5$ .

**Table S4** Hydrogen-bonding geometry (Å, °) for **1-3**

| <i>D-H...A</i>   | <i>H...A</i> | <i>D...A</i> | <i>D-H...A</i> |
|------------------|--------------|--------------|----------------|
| <b>1</b>         |              |              |                |
| O1W-H1WA...O2W#1 | 1.861        | 2.670        | 168.93         |
| O1W-H1WB...O4#2  | 2.050        | 2.835        | 156.56         |
| O1W-H1WB...O3#3  | 2.463        | 3.063        | 129.61         |
| <b>2</b>         |              |              |                |
| O8-H8...O2#1     | 1.910        | 2.685        | 157.15         |
| O1W-H1WA...O2    | 2.036        | 2.841        | 165.57         |
| O1W-H1WB...O7#2  | 2.221        | 2.950        | 147.90         |
| <b>3</b>         |              |              |                |
| O1W-H1WA...O3#1  | 2.115        | 2.893        | 164.79         |
| O1W-H1WB...O2#2  | 2.340        | 2.993        | 142.87         |
| O1W-H1WB...O1#3  | 2.430        | 3.052        | 138.37         |

Symmetry transformations used to generate equivalent atoms: **1**: #1:  $x, y-1, z$ ; #2:  $x, y-1, z$ ; #3:  $-x+0.5, y-0.5, -z+1$ ; **2**: #1:  $x, y+1, z$ ; #2:  $x, y-1, z$ ; **3**: #1:  $-x+0.5, y-0.5, -z+1.5$ ; #2:  $-x+0.5, -y+2.5, -z+1$ ; #3:  $x, -y+2, z-0.5$ .

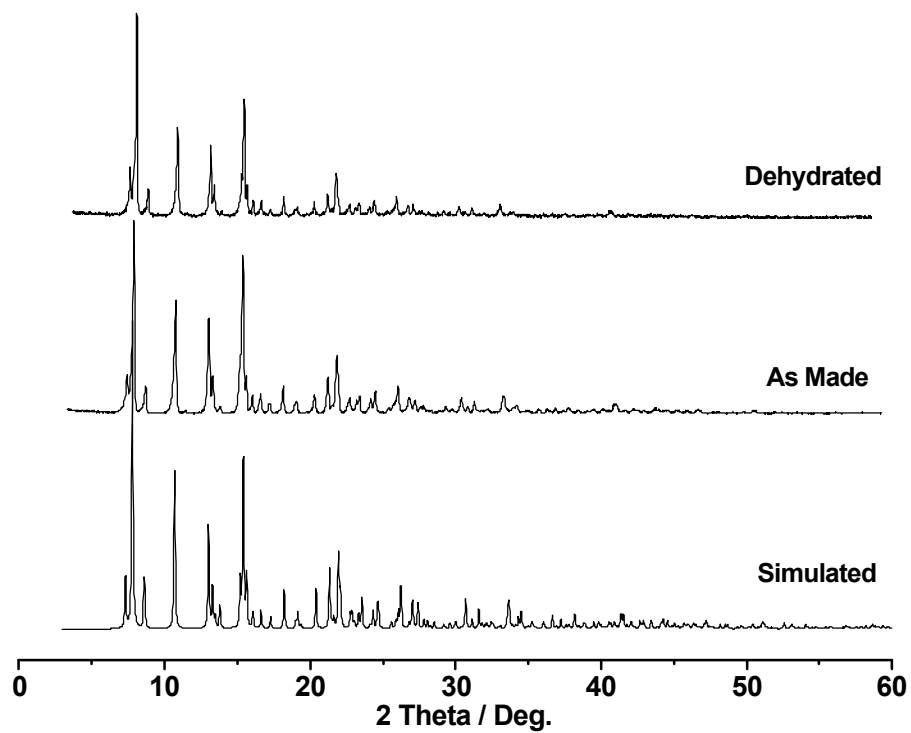

**Fig. S1** PXR D patterns of **1**: simulated, as made and dehydrated.

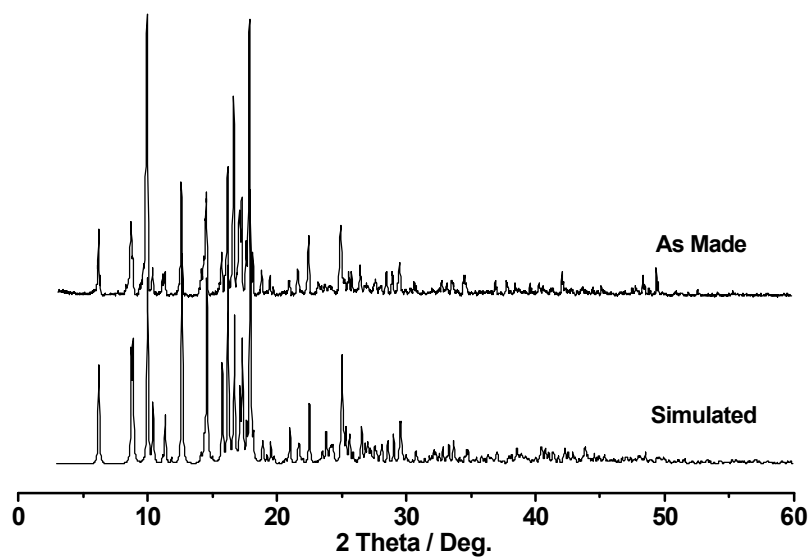

**Fig. S2** PXRd patterns of **2**: simulated and as made.

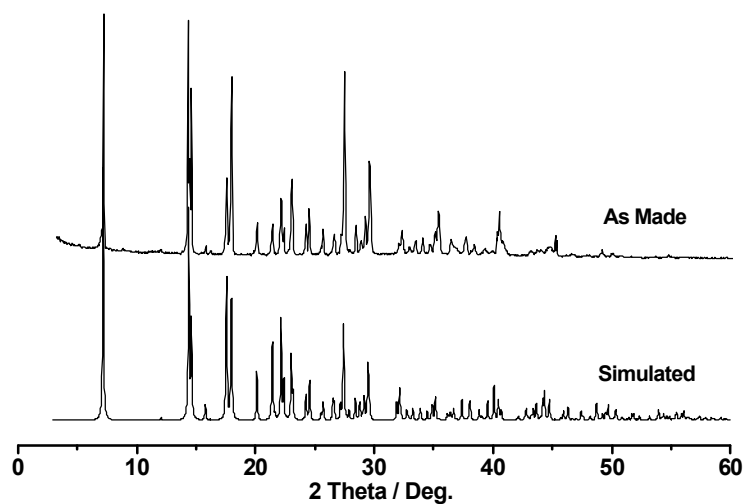

**Fig. S3** PXRd patterns of **3**: simulated and as made.



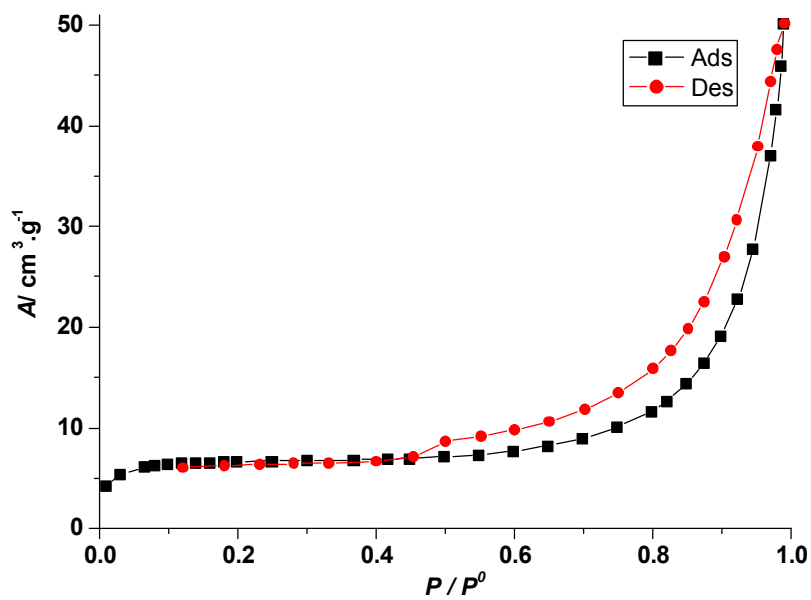

**Figure S4** Nitrogen adsorption and desorption curves of **1** in the range of 0 to 1 atm at 77K.
